# Supplementary material
Source: MDPI journal article supplement (https://www.mdpi.com/2673-5172/4/4/67)
Supplement: s1 [file s1]

Archive with 1 entries (1 files):
- journalmedia-2626307-SI.pdf
