# Supplementary material
Source: MDPI journal article supplement (https://www.mdpi.com/2673-5172/4/4/67)
Supplement: s1 [file s1 › journalmedia-2626307-SI.pdf]

## Supplementary

**Table S1.** A selection of most cited tweets, that are affected by cyber-hate phenomena, containing the word “terrorista” (i.e. terrorist) in the dataset  $D_1$ .

| Summary (translated)                                                                                                                                                                                                                                                                                  | Retweets | Likes |
|-------------------------------------------------------------------------------------------------------------------------------------------------------------------------------------------------------------------------------------------------------------------------------------------------------|----------|-------|
| Silvia Romano did not take off her coat because she converted to Islam! Do you want to see that in a while she makes the terrorist of al shabab her husband come over for family reunification?                                                                                                       | 192      | 710   |
| Silvia Romano, who says she is pregnant with a terrorist, has either been raped and forced to dress in a green curtain to go home (and she would have maximum understanding) or she has taken the step and is a terrorist. I believe the first hypothesis, otherwise she would not have come to Italy | 109      | 389   |
| So Silvia Romano is now Aisha, like the child bride of the "Prophet". We brought home the pregnant wife of a terrorist, lobotomized that she can't wait to get back among those who kidnapped and converted her, and we also paid for it, financing other crimes                                      | 45       | 198   |
| The Calabrian sardine is out of his mind and ignores an elementary reality: the green overcoat worn by Silvia "Aisha" Romano is a terrorist uniform.                                                                                                                                                  | 36       | 79    |

**Table S2.** A selection of most cited tweets, that are affected by cyber-hate phenomena, containing the word “costata” (i.e. has cost) in the dataset  $D_1$ .

| Summary (translated)                                                                                                                                                                                                           | Retweets | Likes |
|--------------------------------------------------------------------------------------------------------------------------------------------------------------------------------------------------------------------------------|----------|-------|
| Silvia Romano was released: "I was strong, I resisted" - Chronicle - ANSA - I am very happy, very happy, for her and for her family, but I would like to know how much her release cost us                                     | 150      | 569   |
| Ms Silvia Romano in addition to costing us a ton of millions, will it still cost us to give her a security? If she has converted to Islam as she seems, she will be subject to a fatwa of death sentence in case of abjuration | 72       | 155   |
| Silvia Romano, not just 4 million for the ransom: the release cost 10 million euros, understand? And then we must not insult her ...                                                                                           | 41       | 77    |
| Vittorio Feltri on Silvia Romano: "Like the two Simones. His craving has cost us dearly, at least don't make fun of us"                                                                                                        | 37       | 95    |

**Table S3.** A selection of most cited tweets, that are affected by cyber-hate phenomena, containing the word “islamica” (i.e. Islamic) in the dataset  $D_1$ .

| Summary (translated)                                                                                                                                                                                 | Retweets | Likes |
|------------------------------------------------------------------------------------------------------------------------------------------------------------------------------------------------------|----------|-------|
| Now on the regime TV our balls are broken with the new Islamic Silvia Romano TG1: the first 3 news all on this to distract the country from the very serious errors and wickedness of the Government | 89       | 264   |
| Release of Silvia Romano = 4000.000 Euro paid by the Italian government to Al Shabaab. And she becomes sympathetically Islamic. Christian martyrs in Africa give thanks.                             | 37       | 62    |

Tables S1 and S2 concern tweets containing the word “terrorista” (i.e. terrorist) and “costata” (i.e. has cost) in the dataset  $D_1$  and affected by cyber-hate phenomena against Silvia Romano. Both Tables contain the following fields:

- *Summary*: a non-literal (English) translation of the tweet because of colloquial language with which posts are often written;
- *Retweets*: number of times this status has been retweeted.
- *Likes*: number of times the tweet has been favorited.

Similar results can be found for the word “islamica” (Islamic). See Table S3.

These results do not mention either the original status (in Italian) or user details. Actually, there are heaps of ethical issues involved with quoting tweets verbatim in a publication, so it is preferable to write just a translated summary of them.

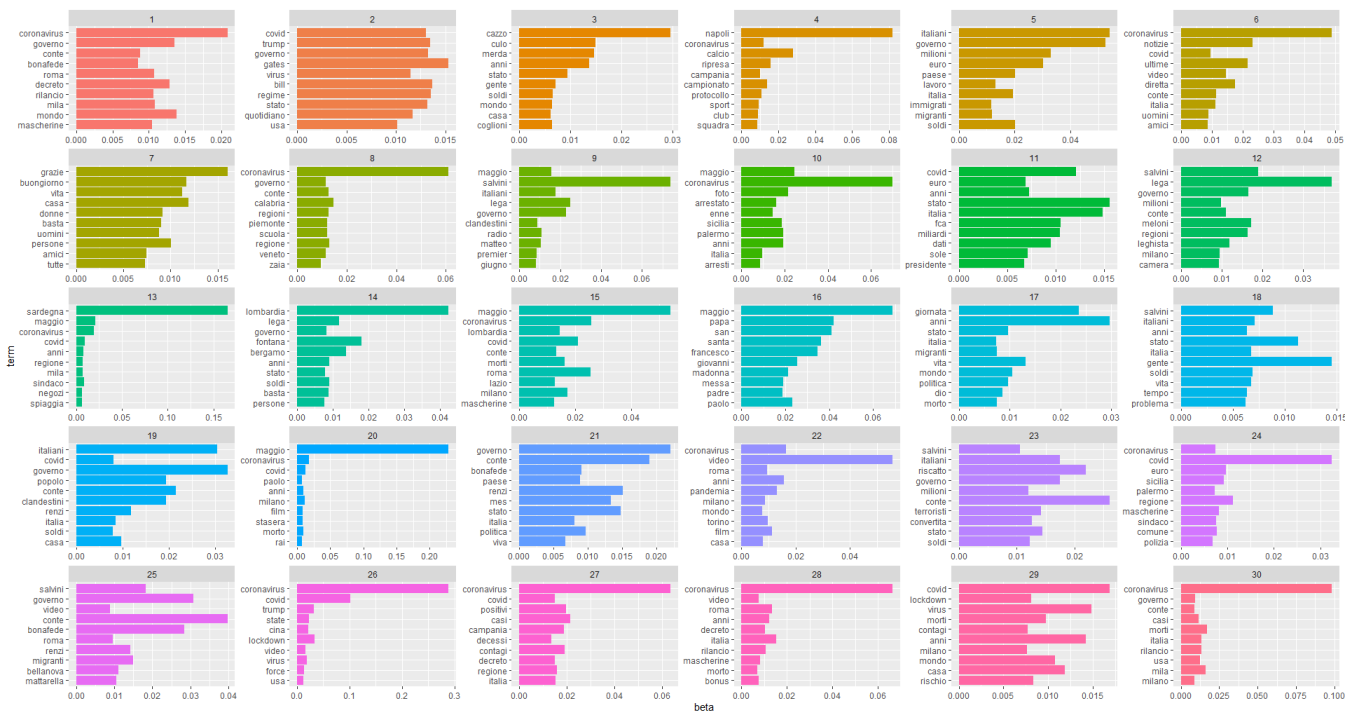

Figure S1. The terms that are most common within each topic in LDA-U (dataset  $D_3$ )

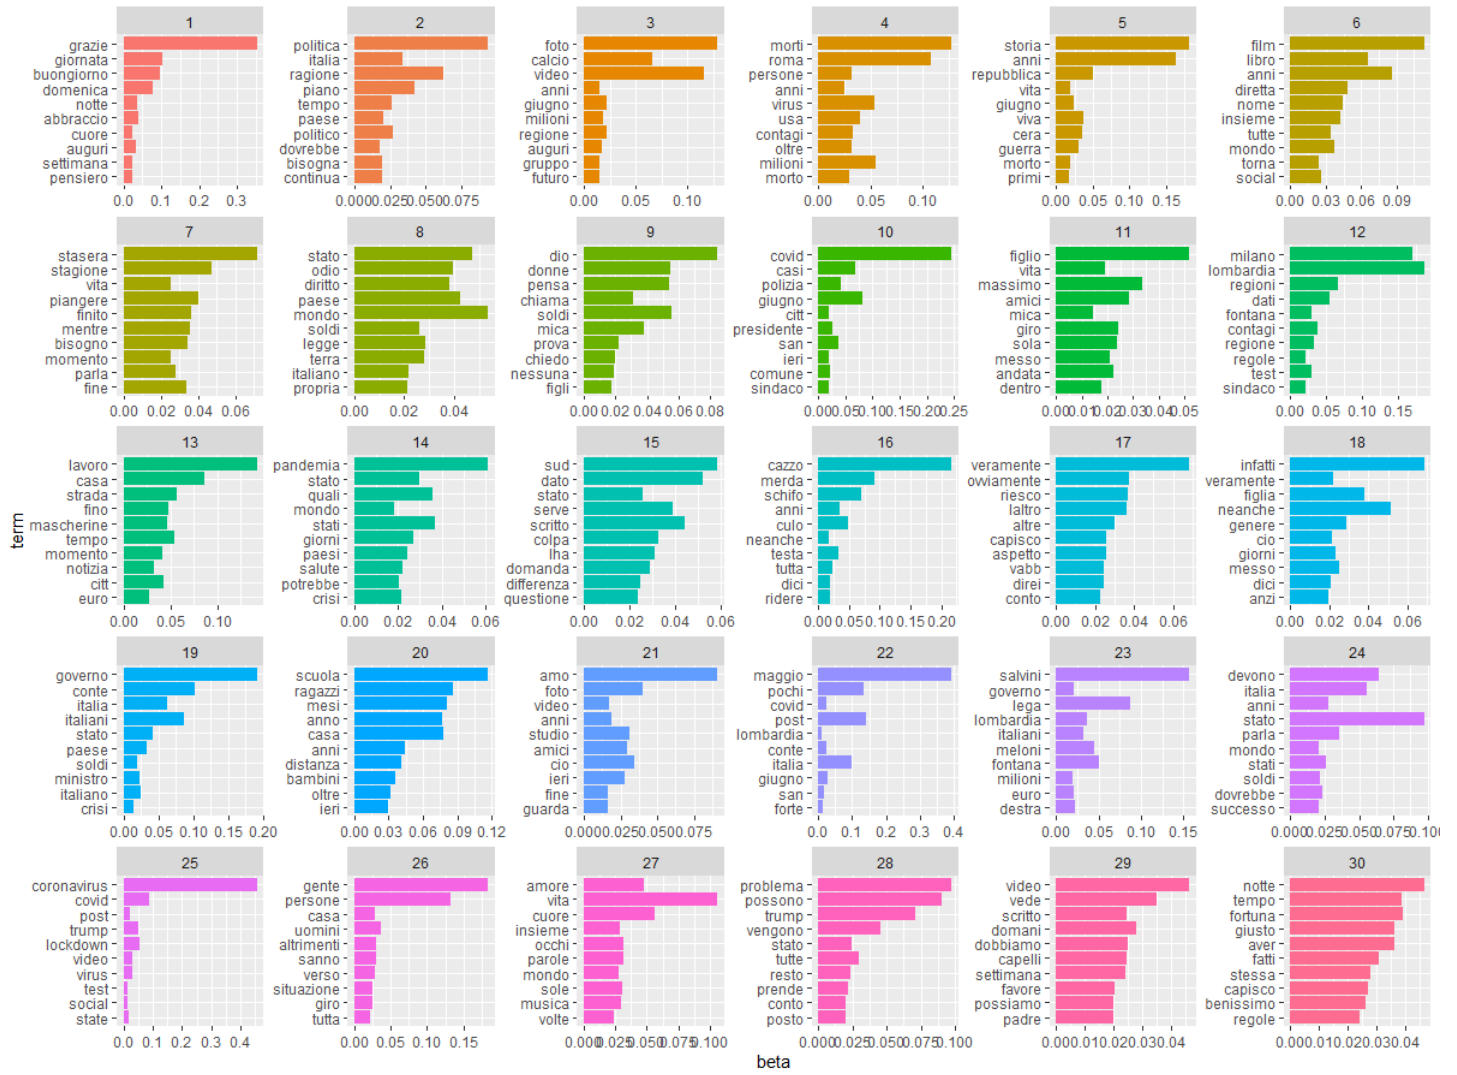

Figure S2. The terms that are most common within each topic in LDA-U (dataset  $\hat{D}_3$ )
